# Supplementary material for: Aqueous phase synthesis of upconversion nanocrystals through layer-by-layer epitaxial growth for in vivo X-ray computed tomography
Source: Royal Society of Chemistry journal article supplement (doi:10.1039/c3nr01530k), 2013-01-01
Supplement: c3nr01530k.pdf [file c3nr01530k.pdf]

## Supporting Information

### Aqueous Phase Synthesis of Upconversion Nanocrystals through Layer-by-layer Epitaxial

#### Growth for *in-vivo* X-Ray Computed Tomography

Feifei Li,<sup>a</sup> Chunguang Li,<sup>a</sup> Jianhua Liu,<sup>b</sup> Xiaomin Liu,<sup>c</sup> Lan Zhao,<sup>d</sup> Tianyu Bai,<sup>a</sup>

Qinghai Yuan,<sup>b</sup> Xiangui Kong,<sup>c</sup> Yu Han,<sup>d</sup> Zhan Shi,<sup>\*a</sup> and Shouhua Feng<sup>a</sup>

<sup>a</sup> F. Li, Dr. C. Li, T. Bai, Prof. Dr. Z. Shi, Prof. Dr. S. Feng  
State Key Laboratory of Inorganic Synthesis and Preparative Chemistry,  
College of Chemistry, Jilin University, Changchun 130012, China  
E-mail: zshi@mail.jlu.edu.cn

<sup>b</sup> J. Liu, Prof. Q. Yuan  
Department of Radiology, the Second Hospital of Jilin University,  
Changchun 130022, China

<sup>c</sup> Dr. X. Liu, Prof. Dr. X. Kong  
State Key Laboratory of Luminescence and Applications,  
Changchun Institute of Optics Fine Mechanics and Physics,  
Chinese Academy of Sciences, Changchun 130033, P.R. China

<sup>d</sup> Dr. L. Zhao, Prof. Dr. Y. Han  
Advanced Membrane and Porous Materials Center & Imaging and Characterization  
Core Lab,  
King Abdullah University of Science and Technology,  
Thuwal 23955-6900, Saudi Arabia

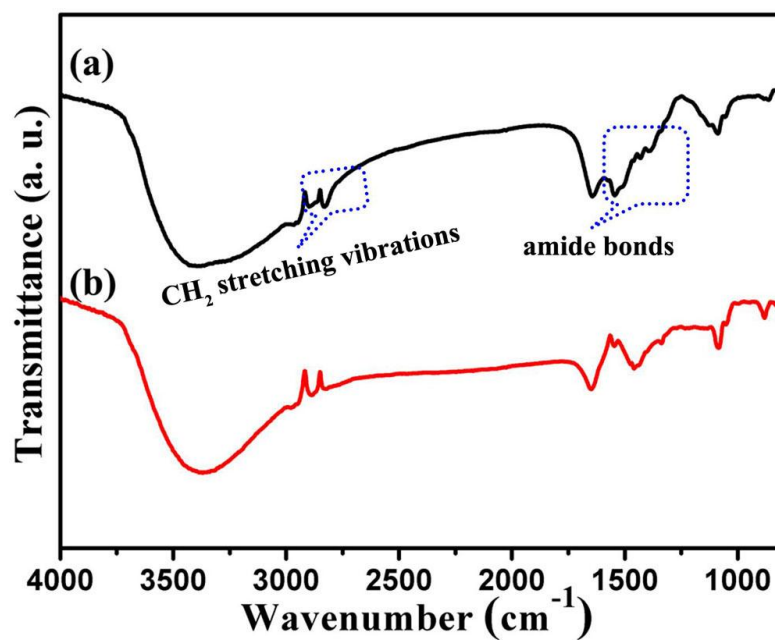

**Figure S1.** FT-IR spectrum of (a) pure NaYF<sub>4</sub>:Yb, Er@NaGdF<sub>4</sub> core-shell UCNCs and (b) PEI capped NaYF<sub>4</sub>:Yb, Er@NaGdF<sub>4</sub> core-shell UCNCs.

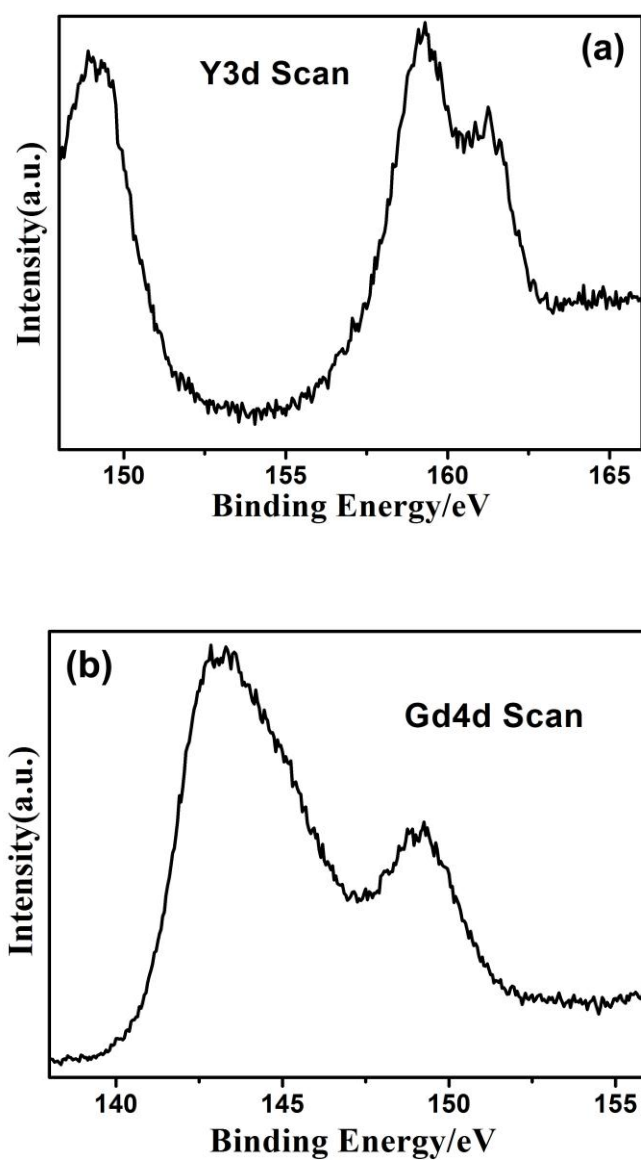

**Figure S2.** X-ray photoelectron spectra of 4-layer NaYF<sub>4</sub>:Yb, Er@NaGdF<sub>4</sub> core-shell UCNCs.

(a) Y3d Scan; (b) Gd4d Scan.

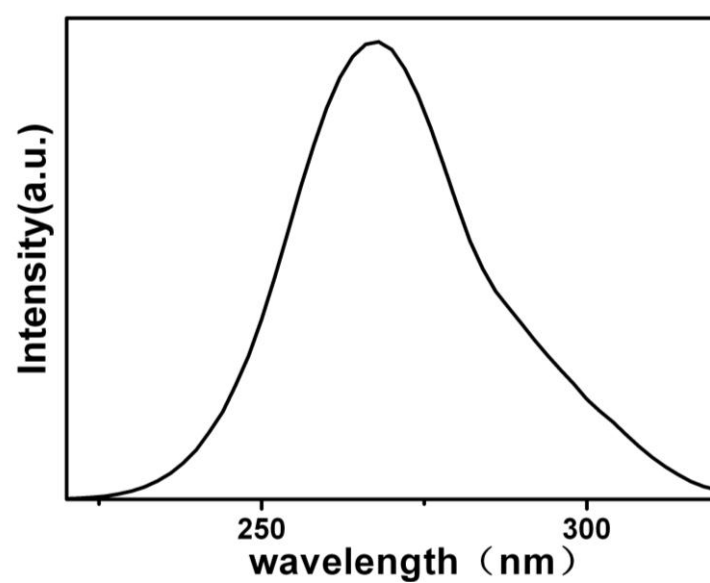

**Figure S3.** Excitation spectrum of NaYF<sub>4</sub>:Yb, Er@NaGdF<sub>4</sub>:Ce, Ln core-shell UCNCs.

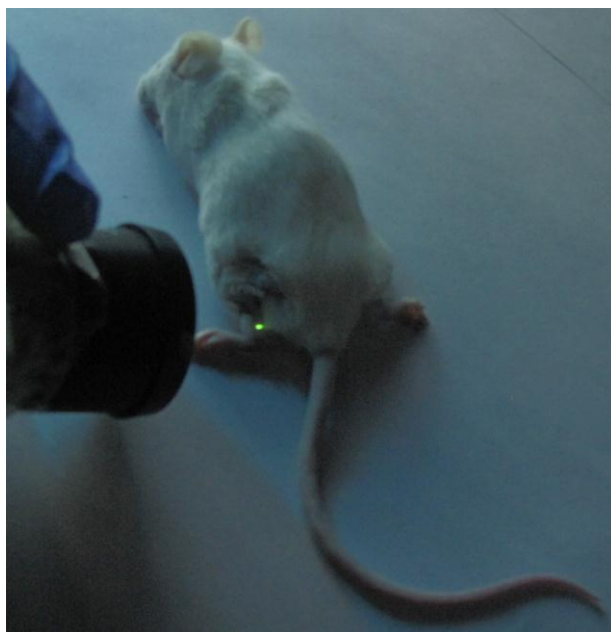

**Figure S4.** *In vivo* upconversion luminescence digital photos of a rat by intravenous NaYF<sub>4</sub>:Yb, Er@NaGdF<sub>4</sub> core-shell UCNCs injection irradiated under 980 nm laser.

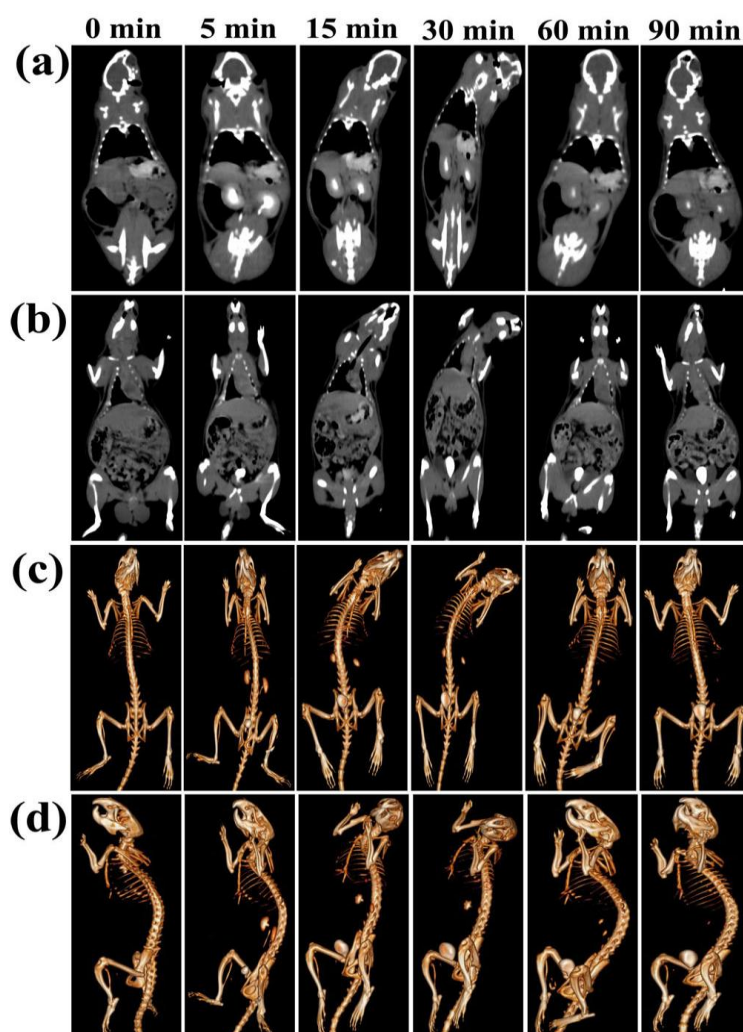

**Figure S5.** *In vivo* CT coronal view images of a rat before and after intravenous injection of 0.3 mL of Iobitridol ( $350 \text{ mg I mL}^{-1}$ ) at timed intervals. (a) Spleen and kidney. (b) Heart, liver and bladder. (c,d) The corresponding 3D-renderings of *in vivo* CT images.

**Table S1** CT values of the heart, liver, spleen and kidney of a rat before and after intravenous administration of 1 mL of 4-layer core/shell UCNCs solution (480 mg Gd mL<sup>-1</sup>) at timed intervals. 237.6 was the CT value of renal pelvis.

| Time          | heart | liver | spleen | kidney |
|---------------|-------|-------|--------|--------|
| Pre-injection | 50    | 67.3  | 58.0   | 40.0   |
| 5 min         | 69.1  | 151.2 | 100    | 69.6   |
| 15 min        | 54.5  | 178.2 | 104.5  | 78.1   |
| 30 min        | 50.5  | 201.6 | 111.0  | 87.9   |
| 60 min        | 50.3  | 220.2 | 116.8  | 84.4   |
| 90 min        | 50.0  | 196.4 | 112.3  | 80.0   |

**Table S2.** CT values of the heart, liver and kidney of a rat before and after intravenous administration of 0.3 mL of Iobitridol (350 mg I mL<sup>-1</sup>) at timed intervals. 599.9 and 703.8 were the CT values of renal pelvis.

| Time          | heart | liver | bladder | kidney       |
|---------------|-------|-------|---------|--------------|
| Pre-injection | 46.4  | 58.7  | 52.1    | 43.5         |
| 5 min         | 63.0  | 73.9  | 951.0   | 106.5, 707.5 |
| 15 min        | 59.1  | 77.6  | 1462.8  | 86.2, 528.2  |
| 30 min        | 53.0  | 55.6  | 2731.7  | 70.4, 412.5  |
| 60 min        | 49.1  | 78.0  | 2975.5  | 62.0, 182.2  |
| 90 min        | 49.0  | 66.8  | 1937.0  | 48.7, 217.2  |
